# Supplementary material for: Could Land Abandonment with Human Intervention Benefit Cropland Restoration? From the Perspective of Soil Microbiota
Source: MDPI journal article supplement (doi:10.3390/land10101049), 2021-10-06
Supplement: s1 [file s1]

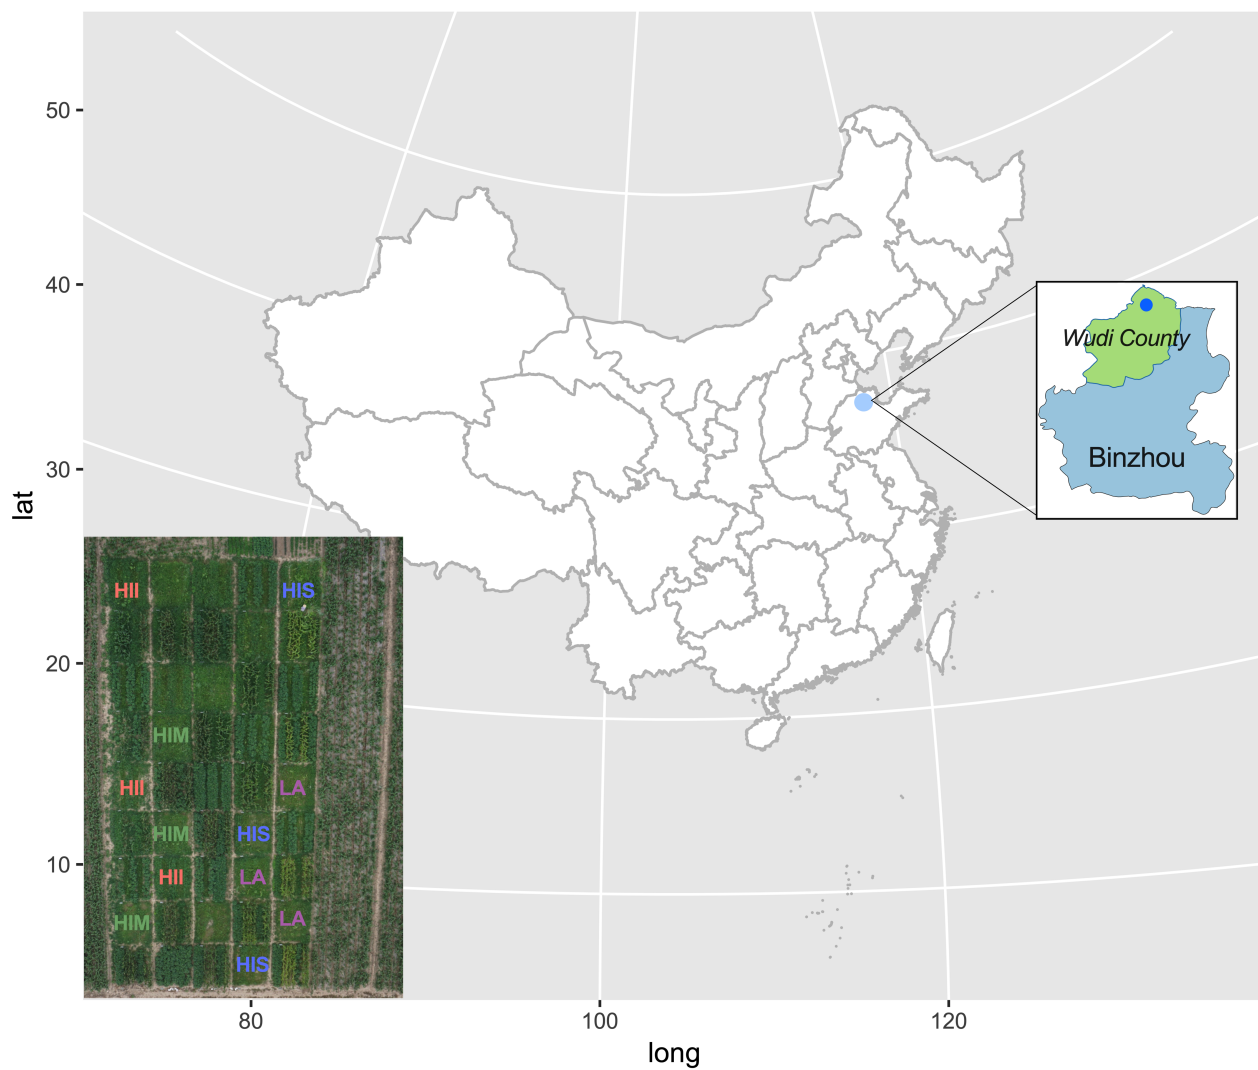

Figure S1 The study area and experimental plots.

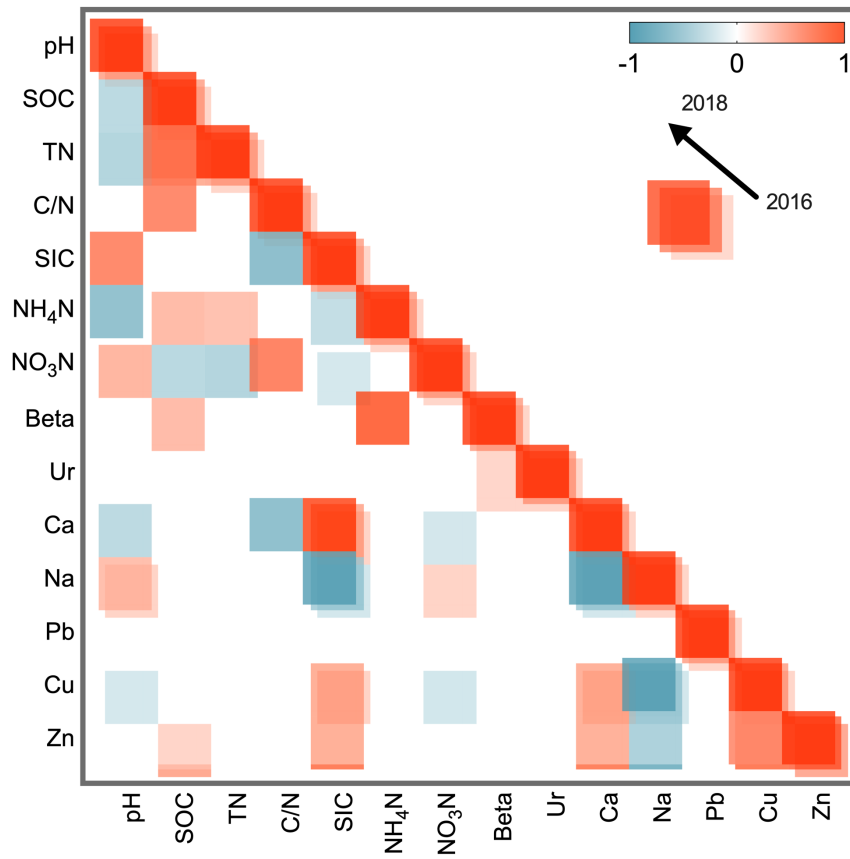

Figure S2 The correlation analysis of soil properties in each year, based on Spearman's Rank correlation analysis. Only significant Spearman's coefficients is shown ( $p < 0.05$ ).

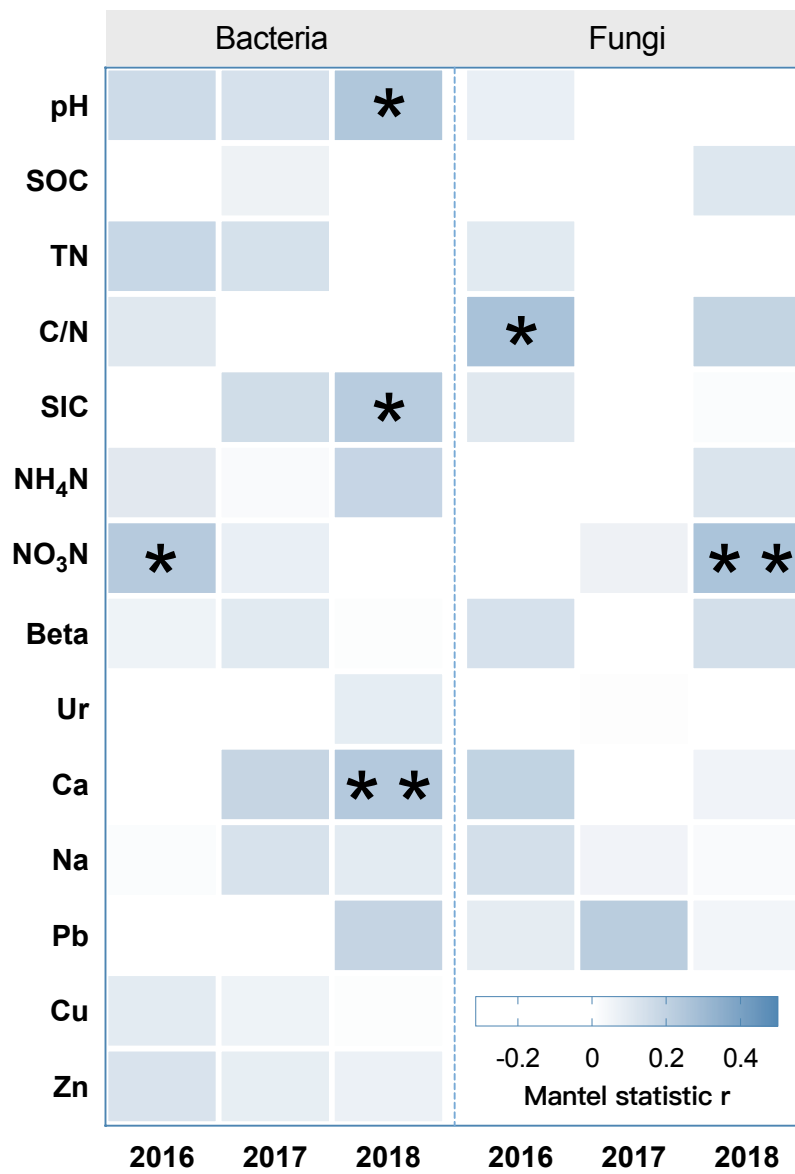

Figure S3 Mantel test between soil properties and microbial community structure. \*, \*\* and \*\*\* are used to show statistical significance at the 0.05, 0.01, and 0.001 level, respectively.

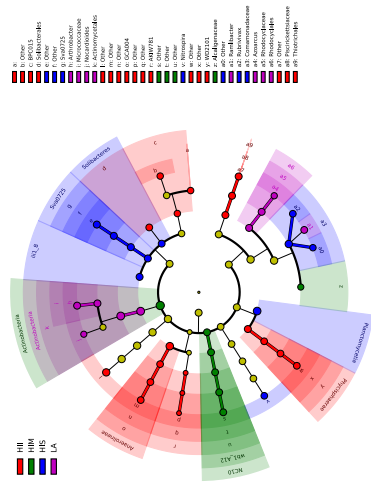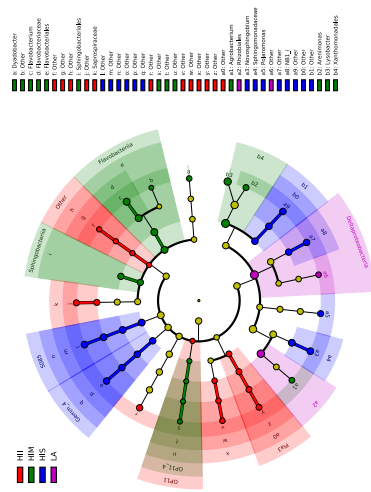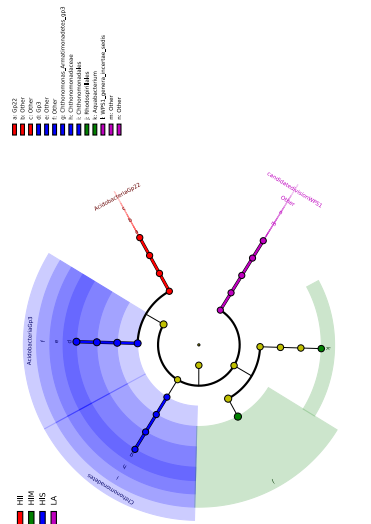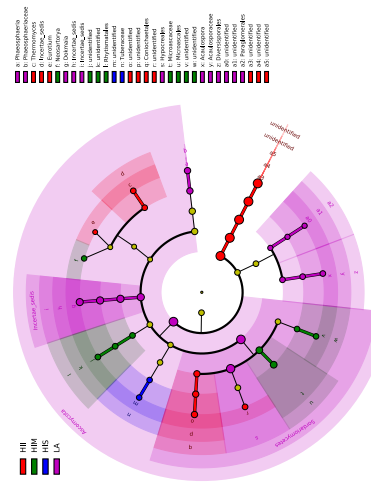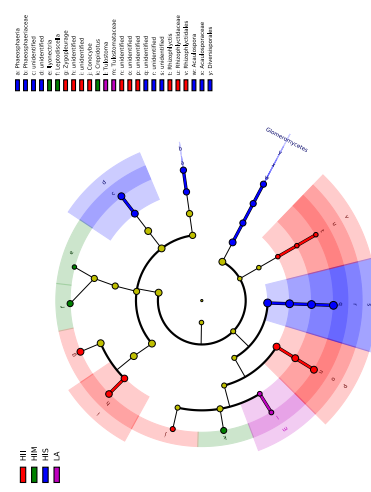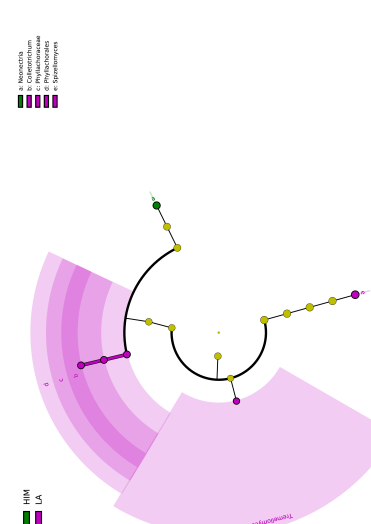

**Bacteria**  
**Fungi**

2018

2017

2016

Figure S4 The results of linear discriminant analysis effect size (LEfSe) on bacterial and fungal communities. The cutoff of LDA score is 2.

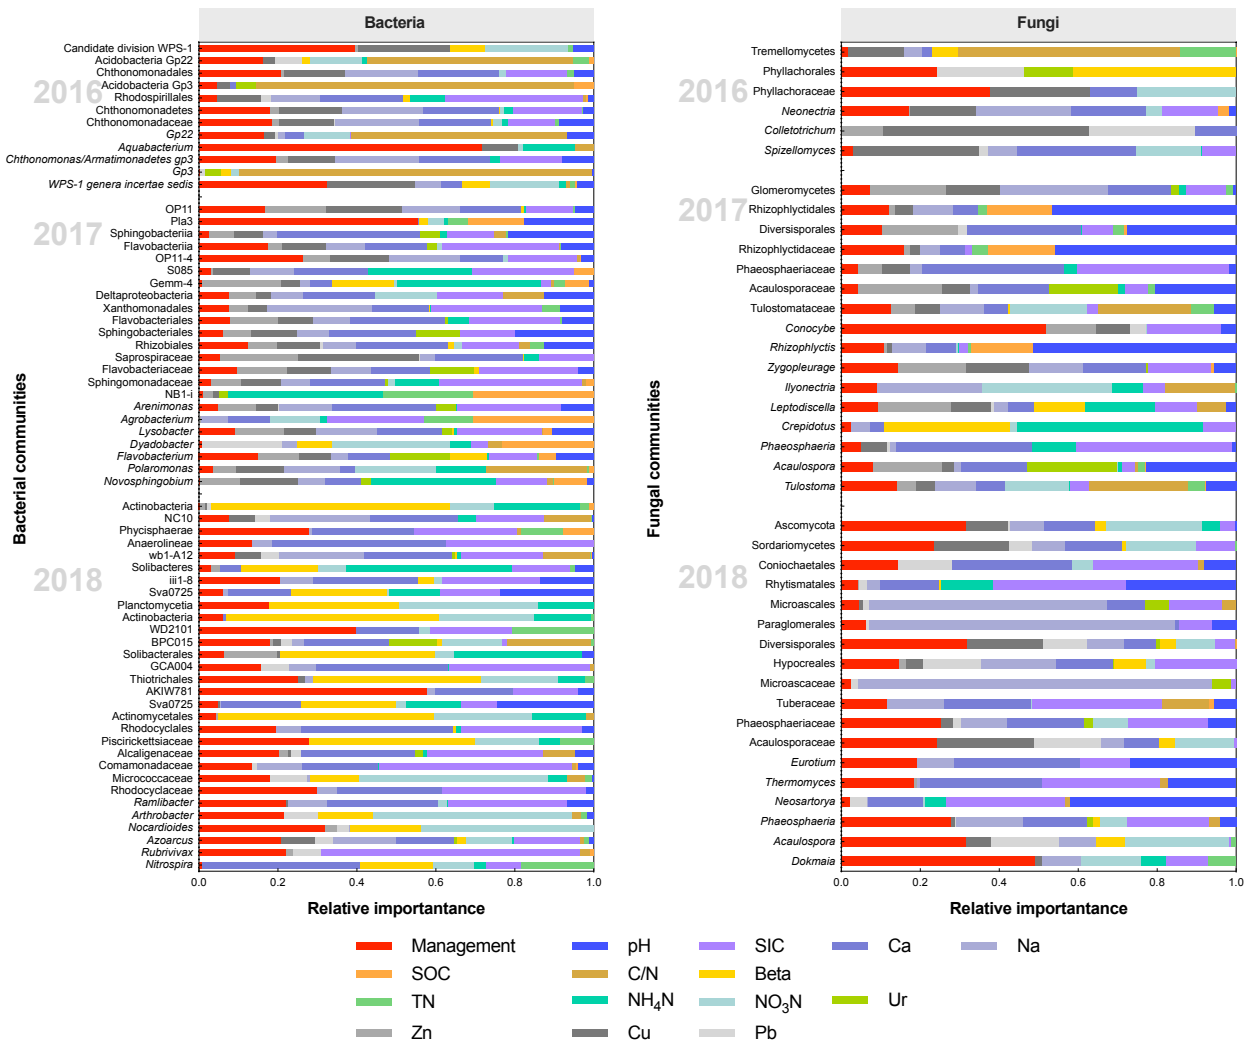

Figure S5 The relative importance ranks of edaphic and human factors on microbial communities, based on %IncMSE of random forests model.
